# Supplementary material
Source: PubMed Central journal article supplement (PMC10895701)
Supplement: NIHMS1965209-supplement-Supplementary_information.pdf [file NIHMS1965209-supplement-Supplementary_information.pdf]

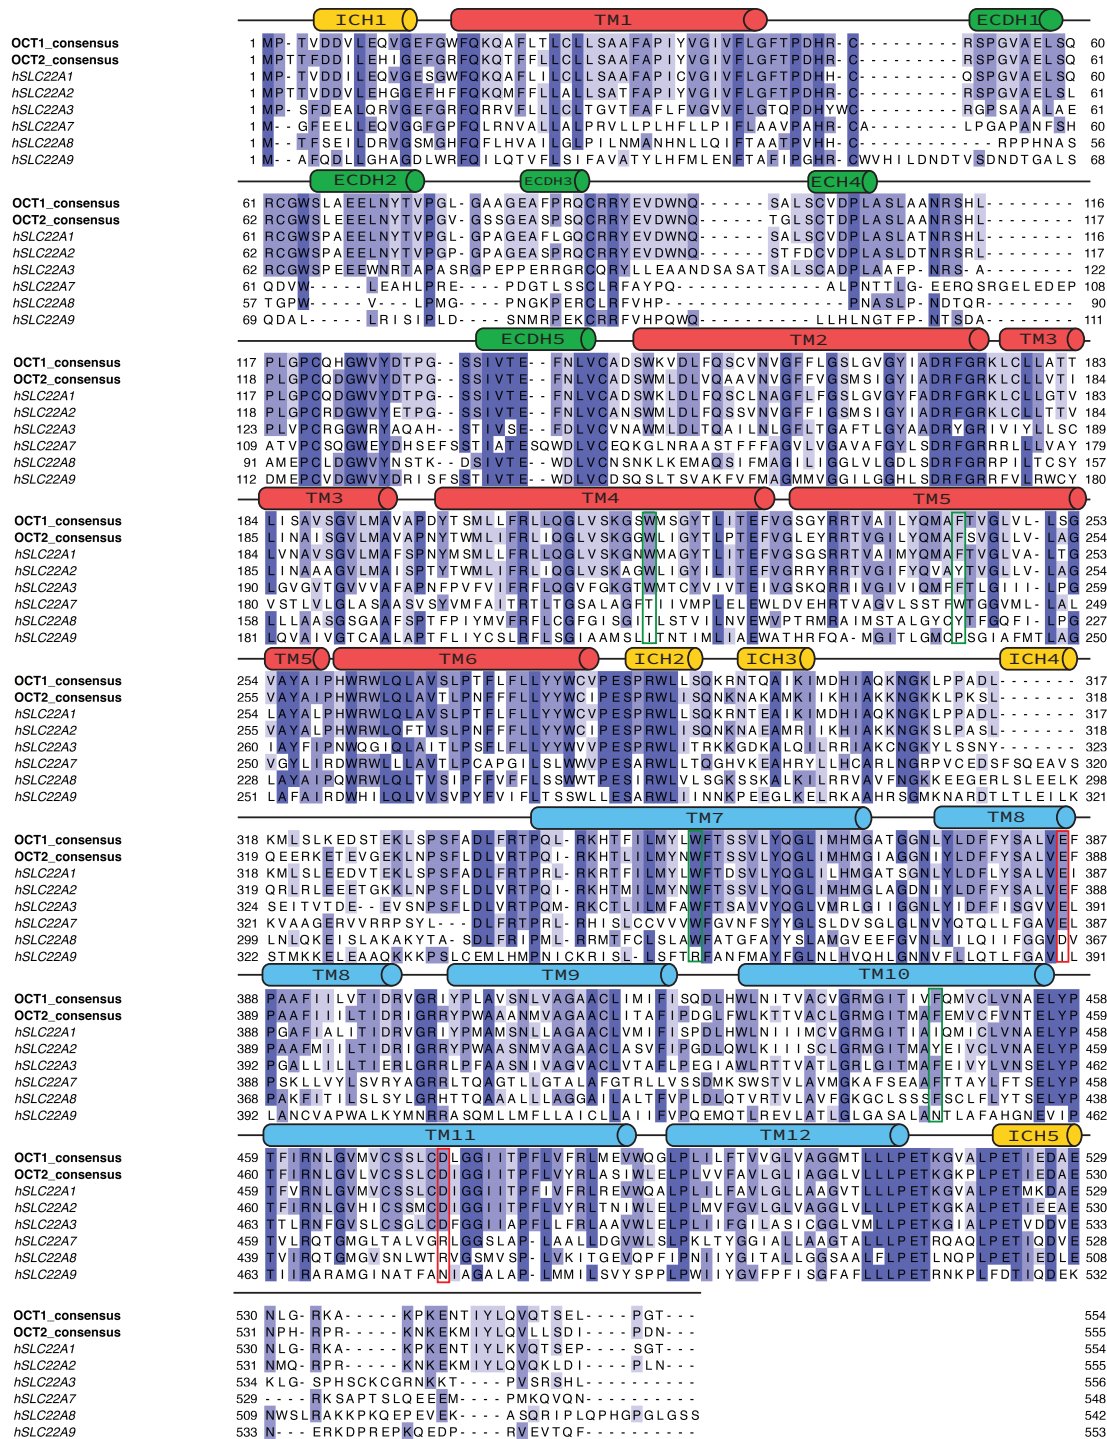

## Supplemental Figure 1 | Multiple Sequence alignment.

Multiple sequence alignment of OCT1<sub>CS</sub>, human OCTs (SLC22A1-3), and representative human OATs (SLC22A7-9). Sequences are aligned using MAFFT<sup>57</sup>. E386 and D474 (numbering according to hOCT1) positions are highlighted in red and 217, 244, 354, and 446 (numbering according to hOCT1) in green.
